# Supplementary material for: Synthesis and characterisation of non-ionic AB-diblock nanoparticles prepared by RAFT dispersion polymerization with polymerization-induced self-assembly
Source: Royal Society of Chemistry journal article supplement (doi:10.1039/c6ra04649e), 2016-01-01
Supplement: c6ra04649e1.pdf [file c6ra04649e1.pdf]

## Supporting Information

### Synthesis and Characterization of Non-ionic AB-diblock Soft Matter Nanoparticles by RAFT PISA

Yiwen Pei,<sup>1,2</sup> Kevin Jarrett,<sup>3</sup> Leonardo Gutierrez Garces,<sup>2,4,5</sup> Martin Saunders,<sup>6</sup> Jean-Philippe Croue,<sup>2,4</sup> Peter J. Roth,<sup>1,2</sup> Craig Buckley<sup>3</sup> and Andrew B. Lowe<sup>1,2\*</sup>

1. Nanochemistry Research Institute (NRI), Curtin University, Kent Street, Bentley, Perth, WA 6102, Australia.
2. Department of Chemistry, Curtin University, Kent Street, Bentley, Perth, WA 6102, Australia.
3. Department of Physics and Astronomy, Curtin University, Kent Street, Bentley, Perth, WA 6102, Australia.
4. Curtin Water Quality Research Centre, Curtin University, Kent Street, Bentley, Perth, WA 6102, Australia.
5. Facultad del Mar y Medio Ambiente, Universidad del Pacifico, Guayaquil, Ecuador.
6. Centre for Microscopy, Characterization and Analysis (CMCA), University of Western Australia, 35 Stirling Highway, Crawley, WA 6009, Australia.

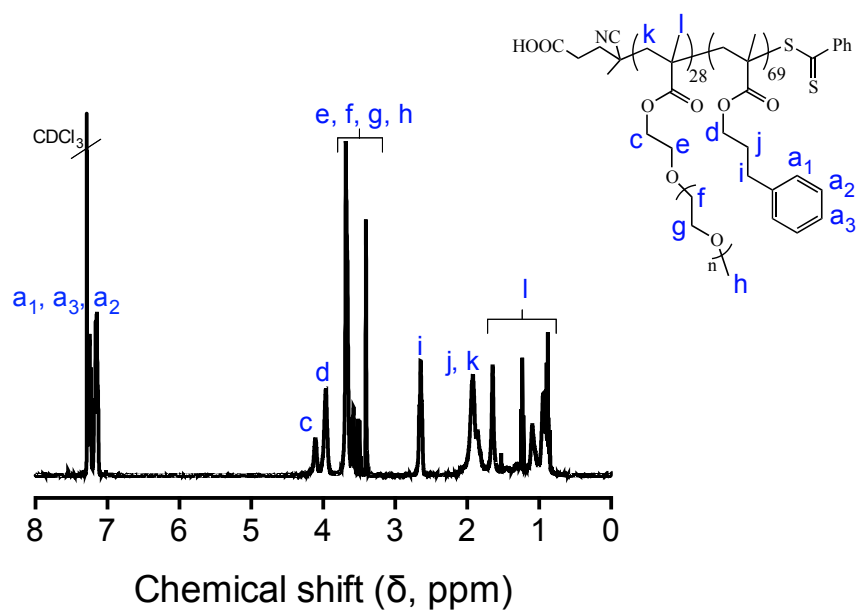

**Figure S1.** <sup>1</sup>H NMR spectrum of p(OEGMA<sub>28</sub>-b-PPMA<sub>69</sub>), recorded in CDCl<sub>3</sub>, with peak assignments.

## Small Angle X-Ray Scattering

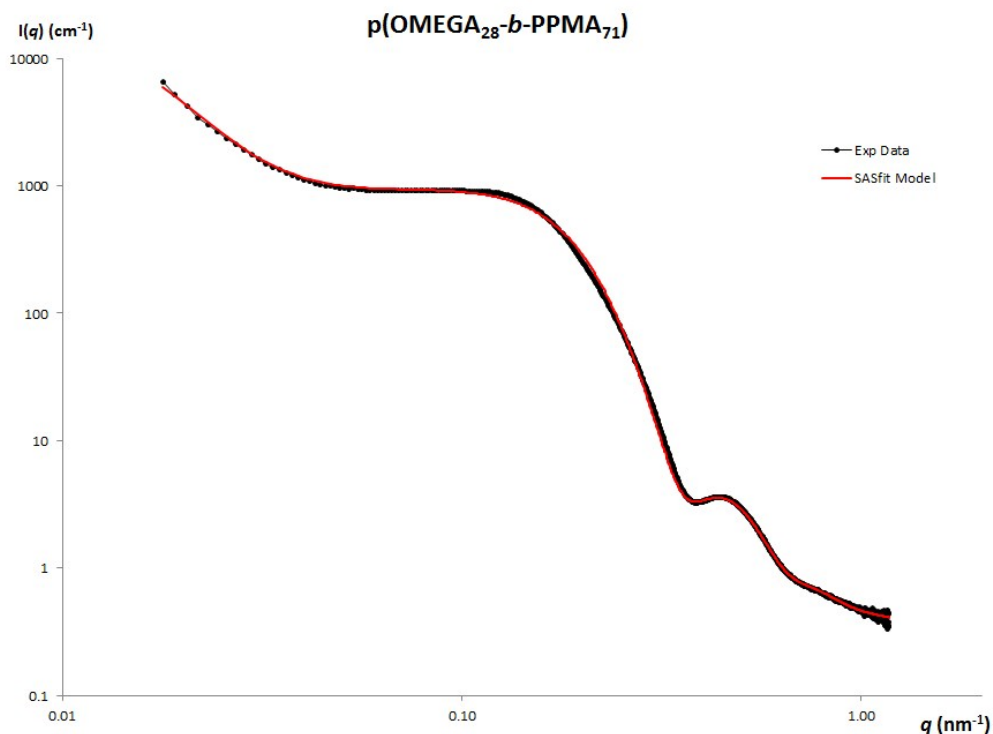

FigureS1 – The SAXS data and model for p(OMEGA)<sub>28</sub>-b-pPPMA<sub>71</sub>. The feature at  $q = 0.5 \text{ nm}^{-1}$  is again prominent in the data.

For the model of p(OMEGA)<sub>28</sub>-b-pPPMA<sub>71</sub> the cross sectional radius is  $15.3 \pm 0.1 \text{ nm}$ , or  $30.6 \pm 0.2 \text{ nm}$  for the average width of the worm like micelles, which is a slightly larger structure than the p(OMEGA)<sub>28</sub>-b-pPPMA<sub>69</sub> micelles. The TEM data for this phase gives a width of  $28.8 \pm 3.6 \text{ nm}$  for these worms which is in agreement with the results from the SAXS model within uncertainty. The correlation peak is located at  $q = 0.132 \pm 0.05 \text{ nm}^{-1}$ , which corresponds to a larger distance between interacting micelles of  $47.6 \pm 0.5 \text{ nm}$  when compared to the  $36.7 \pm 0.5 \text{ nm}$  from p(OMEGA)<sub>28</sub>-b-pPPMA<sub>69</sub>.

SASfit was used to model the SAXS data obtained from spherical and worm-like polymer micelles<sup>[1]</sup>. The software package has been developed for the general analysis of scattering data using a variety of shapes (form factors) and models for the interaction of particles (structure factors). The models are implemented with a general equation for the scattering from non-interacting particles (adapted from page 196 of the SASfit manual).

$$I(q)_D = |\Delta\rho|^2 \int_0^\infty |F(q, r)|^2 \cdot V^2(r) \cdot N \cdot P(r) dr$$

The integral is implemented in SASfit with the following;  $|\Delta\rho|$  is the scattering contrast,  $|F(q, r)|$  is the form factor,  $V(r)$  is the volume of the particle,  $N$  is the number of particles, and  $P(r)$  is the size distribution. If a structure factor is included then

$$I(q) = I(q)_D \cdot S(q)$$

Where  $S(q)$  is the structure factor. This calculated value for the intensity is then fit to experimental data using a non-negative least squares method. From the equation for the modelled intensity it can be seen that the correct form factor is a significant choice as it appears squared. So for the simplest cases a sphere is often chosen

$$F_{\text{Sphere}}(q, r) = \frac{3 \cdot (\sin(qr) - qr \cdot \cos(qr))}{(qr)^3}$$

Where  $r$  is the radius of the sphere. This was the form factor incorporated into the model of the p(OMEGA<sub>28</sub>)-*b*-(PPMA<sub>36</sub>) data. In contrast, the form factor of a polymer with a worm-like morphology is more complicated. Kholodenko developed the theoretical framework to describe these semi-flexible chains and they have been incorporated into the SASfit package (see page 94 of the user manual)<sup>[2]</sup>. The important inputs for this form factor are the cross sectional radius,  $r$ , the Kuhn length describing the rigid length of the chain,  $l$ , and the contour length describing the total length,  $L$ .

At larger size scales the polymer aggregates in solution exhibit the self-similar characteristics of mass fractals. This is most prominently displayed in the scattering curves as a sharp gradient at low- $q$  where a dilute solution might be expected to plateau. To account for this feature of the scattering curve an exponential mass fractal term was included in the model as implemented by the SASfit software (page 135 of the user manual)<sup>[3]</sup>.

As these are not dilute samples a structure factor was incorporated into the model. The structure factor used is from the Random Phase Approximation<sup>[4]</sup>.

$$S(q) = \frac{1}{1 + v \cdot F(q, r)}$$

Where  $F(q,r)$  is the form factor being used and  $\nu$  is a parameter related to the concentration of the polymer in solution.

References for Supplementary Material:

- [1] I. Breßler *et. al.* J. Appl. Cryst. (2015) 48, 1587 – 1598.
- [2] A.L. Kholodenko Macromolecules (1993) 26, 4179 – 4183.
- [3] C.M. Sorensen & G.M. Wang Physical Review E (1999) 60, 7143 – 7148.
- [4] J.S. Pedersen, Advances in Colloid and Interface Sciences (1997) 70, 171-210.
